# Supplementary material
Source: PubMed Central journal article supplement (PMC3800085)
Supplement: NIHMS501715-supplement-supplement.pdf [file NIHMS501715-supplement-supplement.pdf]

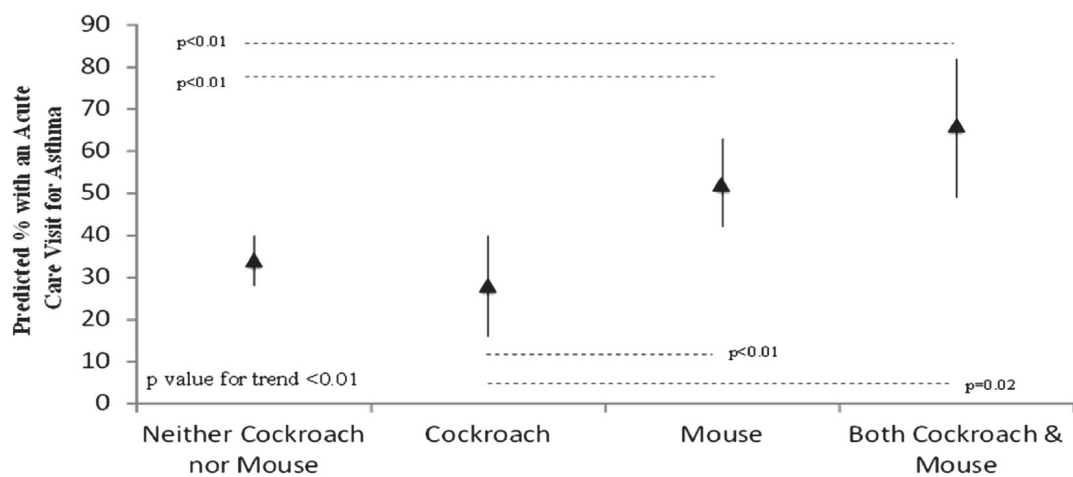

**FIG E1.** Predicted percentage of subjects with an acute care visit in 3 months across cockroach and mouse sensitization and exposure groups. Sensitization and exposure groups using exposure data from bed dust samples are plotted on the *x-axis*. The predicted percentage of subjects with an acute care visit over 3 months is plotted on the *y-axis*. Significant comparisons are marked with *dashed lines* and *P* values.

**TABLE E1.** Clinical features of asthma across mouse and cockroach sensitization/exposure groups

|                                  | Bedroom dust               |                |                | Bed dust   |                            |                |                |          |
|----------------------------------|----------------------------|----------------|----------------|------------|----------------------------|----------------|----------------|----------|
|                                  | Percent predicted (95% CI) | P value        |                |            | Percent predicted (95% CI) | P value        |                |          |
| Acute health care visits in 3 mo |                            | vs neither     | vs cockroach   | vs mouse   |                            | vs neither     | vs cockroach   | vs mouse |
| Sensitization/exposure group     |                            |                |                |            |                            |                |                |          |
| Neither                          | 33 (26-40)                 | —              | —              | —          | 34 (28-40)                 | —              | —              | —        |
| Cockroach                        | 41 (31-52)                 | .17            | —              | —          | 28 (16-40)                 | .36            | —              | —        |
| Mouse                            | 45 (35-55)                 | <b>.04</b>     | .66            | —          | 52 (42-63)                 | <b>&lt;.01</b> | <b>.02</b>     | —        |
| Both                             | 53 (42-64)                 | <b>&lt;.01</b> | .15            | .2         | 66 (49-82)                 | <b>&lt;.01</b> | <b>&lt;.01</b> | .10      |
| P value for trend across groups  |                            |                | <b>&lt;.01</b> |            |                            |                | <b>&lt;.01</b> |          |
| FENO                             |                            |                |                |            |                            |                |                |          |
|                                  | Predicted (95% CI)         | P value        |                |            | Predicted (95% CI)         | P value        |                |          |
| Sensitization/exposure group     |                            | vs neither     | vs cockroach   | vs mouse   |                            | vs neither     | vs cockroach   | vs mouse |
| Neither                          | 28.2 (24.5-32.4)           | —              | —              | —          | 30.2 (26.3-33.9)           | —              | —              | —        |
| Cockroach                        | 27.5 (22.9-33.1)           | .76            | —              | —          | 27.5 (22.4-33.9)           | .41            | —              | —        |
| Mouse                            | 34.7 (29.5-40.7)           | <b>.02</b>     | .08            | —          | 32.4 (26.9-38.0)           | .40            | .09            | —        |
| Both                             | 33.9 (28.2-40.7)           | .07            | .17            | .74        | 33.9 (25.7-44.7)           | .41            | .15            | .98      |
| P value for trend across groups  |                            |                | .05            |            |                            |                | .39            |          |
| FEV <sub>1</sub> /FVC (%)        |                            |                |                |            |                            |                |                |          |
|                                  | Predicted (95% CI)         | P value        |                |            | Predicted (95% CI)         | P value        |                |          |
| Sensitization/exposure group     |                            | vs neither     | vs cockroach   | vs mouse   |                            | vs neither     | vs cockroach   | vs mouse |
| Neither                          | 80.1 (78.6-81.6)           | —              | —              | —          | 81.2 (79.8-82.6)           | —              | —              | —        |
| Cockroach                        | 81.8 (79.8-83.8)           | .09            | —              | —          | 81.7 (79.4-84.1)           | .62            | —              | —        |
| Mouse                            | 80.6 (78.8-82.5)           | .58            | .15            | —          | 80.5 (78.6-82.4)           | .46            | .77            | —        |
| Both                             | 80.5 (78.5-82.4)           | .73            | <b>.03</b>     | .95        | 77.2 (74.2-80.3)           | <b>.01</b>     | <b>.02</b>     | .73      |
| P value for trend across groups  |                            |                | .57            |            |                            |                | .10            |          |
| Bronchodilator reversibility     |                            |                |                |            |                            |                |                |          |
|                                  | Percent predicted (95% CI) | P value        |                |            | Percent predicted (95% CI) | P value        |                |          |
| Sensitization/exposure group     |                            | vs neither     | vs cockroach   | vs mouse   |                            | vs neither     | vs cockroach   | vs mouse |
| Neither                          | 22 (15-29)                 | —              | —              | —          | 21 (15-28)                 | —              | —              | —        |
| Cockroach                        | 23 (13-33)                 | .85            | —              | —          | 13 (3-23)                  | .17            | —              | —        |
| Mouse                            | 20 (12-29)                 | .75            | .78            | —          | 30 (19-41)                 | .11            | <b>.03</b>     | —        |
| Both                             | 37 (25-49)                 | <b>.02</b>     | .07            | <b>.01</b> | 38 (20-56)                 | .05            | <b>.03</b>     | .69      |
| P value for trend across groups  |                            |                | .06            |            |                            |                | <b>.04</b>     |          |

The interaction between sensitization and exposure to mouse allergen and sensitization and exposure to cockroach allergen was evaluated by using a model incorporating a single categorical variable that captured the 4 different combinations related to cockroach and mouse sensitization and exposure: subjects were assigned a value of 0 if they were not sensitized and exposed to either mouse or cockroach, a value of 1 if they were sensitized and exposed to cockroach but not mouse, a value of 2 if they were sensitized and exposed to mouse but not cockroach, and a value of 3 if they were sensitized and exposed to both mouse and cockroach. Adjusted model includes age, sex, total IgE level, and type of insurance.
